# Supplementary material for: Affective Computing Based on Morphological Features of Photoplethysmography for Patients with Hypertension
Source: MDPI journal article supplement (doi:10.3390/s22228771), 2022-11-13
Supplement: s1 [file s1]

**Supplement Table S1.** The emotional checklist and rating.

| Emotion checklist  | Emotion    | Anger (1)<br>Mean (SD) | Happiness (2)<br>Mean (SD) | Sadness (3)<br>Mean (SD)                         | F          | p      | $\eta^2$ | Bonfer-<br>roni<br>Post hoc<br>compari-<br>son |
|--------------------|------------|------------------------|----------------------------|--------------------------------------------------|------------|--------|----------|------------------------------------------------|
|                    | Anger      | 4.37 (0.58)            | 1.00 (0.00)                | 1.07 (0.26)                                      | 1186.77*** | <0.001 | 0.97     | 1 > 2,3                                        |
|                    | Happiness  | 1.00 (0.00)            | 4.60 (0.49)                | 1.00 (0.00)                                      | 2282.92*** | <0.001 | 0.98     | 2 > 1,3                                        |
|                    | Sadness    | 1.02 (0.15)            | 1.00 (0.00)                | 4.53 (0.50)                                      | 1836.24*** | <0.001 | 0.98     | 3 > 1,2                                        |
| Emotion rating (%) | Past event | During experimental    |                            | Percentage<br>of emotion<br>was in-<br>duced (%) |            |        |          |                                                |
|                    | Anger      | 88.14 (10.91)          | 85.23 (12.34)              | 97.69<br>(16.11)                                 |            |        |          |                                                |
|                    | Happiness  | 94.30 (6.95)           | 89.77 (8.31)               | 95.49 (9.03)                                     |            |        |          |                                                |
|                    | Sadness    | 91.98 (8.87)           | 95.49 (9.03)               | 96.30<br>(11.70)                                 |            |        |          |                                                |

\* $p < 0.05$ , \*\* $p < 0.01$ , \*\*\* $p < 0.001$
